# Supplementary material for: Mechanochemical aerobic oxidative Heck coupling by polymer-assisted grinding: cyclodextrin additive facilitating regioselectivity control
Source: Royal Society of Chemistry journal article supplement (doi:10.1039/d4gc01006j), 2024-01-01
Supplement: d4gc01006j2.xlsx [file d4gc01006j2.xlsx]

## Sheet: Sheet1
entry			This work	This work (recycle)	JACS, 2011, 133, 9692	CC, 2014, 50, 3725
method			This work	Recycle	Ref 1	Ref 2
Atmosphere			O2	O2	-	-
Aryl	M	mmol	0.5	0.5	0.55	0.5
	MW	g/mmol	121.93	121.93	191.92	104.15
	Weight	mg	60.965	60.965	105.556	52.075
Olefin	M	mmol	0.5	0.5	0.5	1.5
	MW	g/mmol	168.32	168.32	168.32	268.18
	Weight	mg	84.16	84.16	84.16	402.27
Catalyst	catalyst1		Pd(TFA)2	Pd(TFA)2 (recycle)	Pd2(dba)3	Pd(PPh3)4
	M	mmol	0.05	0.01	0.015	0.05
	MW	g/mmol	332.45	332.45	915.72	1155.56
	Weight	mg	16.6225	3.32	13.7358	57.778
	catalyst2					dppf
	M	mmol				0.07
	MW	g/mmol				554.38
	Weight	mg				38.8066
Additive	additive1		a-CD	a-CD (recycle)	-	NCy2Me
	M	mmol	0.2	0.04		2
	MW	g/mmol	972.84	972.84		195.34
	Weight	mg	194.568	38.91	0	390.68
	additive2		O2	O2		LiI
	M	mmol	0.5	0.5		1.5
	MW	g/mmol	32	32		133.85
	Weight	mg	16	16		200.775
Solvent	solvent		-	-	DMA	PhCF3
	M	mmol
	MW	g/mmol			87.12	146.11
	Volume	mL			5	2
	Density	g/mL			0.937	1.19
	Weight	mg			4685	2380
Product	MW	g/mmol	244.41	244.41	244.41	244.41
	TW	mg	122.205	122.205	122.205	122.205
	M	mmol	0.36	0.345	0.35	0.329
	AW	mg	87.9876	84.3214	85.5435	80.4109
	Yield		72	69	70	65.8
Reaction time		h	0.5	0.5	0.33	48
Reaction temperature		℃	rt	rt	rt	110
Effective Mass Yield		EMY/%	54.3981	56.8032	1.74991	2.28285
Atom Economy		AE/%	75.8448	75.8448	64.4147	26.897
Atom Efficiency		AEF/%	54.6083	52.3329	45.0903	17.6982
Reaction Mass Efficiency		RME/%	23.6325	41.4651	1.74991	2.28285
Optimum Efficiency		OE/%	31.1591	54.671	2.71663	8.4874
Process Mass Intensity		PMI	4.23145	2.41166	57.1458	43.8048
Mass Intensity		MI	4.23145	2.41166	57.1458	43.8048
E-factor			3.23145	1.41166	56.1458	42.8048
Solvent Intensity		SI	0	0	54.7675	29.598
